# Supplementary material for: Functional Ex Vivo Tissue-Based Chemotherapy Sensitivity Testing for Breast Cancer
Source: MDPI journal article supplement (doi:10.3390/cancers14051252), 2022-02-28
Supplement: s1 [file s1]

# Functional Ex Vivo tissue-based chemotherapy sensitivity testing for breast cancer

Marjolijn M. Ladan, Titia G. Meijer, Nicole S. Verkaik, Zofia M. Komar, Carolien H.M. van Deurzen, Michael A. den Bakker, Roland Kanaar, Dik C. van Gent and Agnes Jager

**Table S1.** Characteristics of 13 primary breast cancer samples for cisplatin treatment.

| Tumor Code | Ex vivo Sensitivity | Receptor Status | Histology            | Grade | BRCA Status    |
|------------|---------------------|-----------------|----------------------|-------|----------------|
| M141       | Intermediate        | ER/PR +, HER2-  | ductal               | 3     | Unknown        |
| M143       | Intermediate        | ER/PR +, HER2-  | ductal               | 3     | Unknown        |
| M153       | Resistant           | ER/PR +, HER2-  | ductal               | 3     | Unknown        |
| M167       | Intermediate        | ER/PR +, HER2-  | ductal               | 3     | Non-BRCA       |
| M188       | Intermediate        | ER/PR +, HER2-  | ductal               | 3     | BRCA2 mutation |
| M335       | Intermediate        | ER/PR +, HER2-  | Neuroendocrine       | 3     | Not tested     |
| M348       | Intermediate        | HER2+           | Mucinous             | 3     | Non-BRCA       |
| M356       | Resistant           | ER/PR +, HER2-  | Ductal               | 2     | Not tested     |
| M357       | Resistant           | ER/PR +, HER2-  | Micropapillar/ductal | 2     | Unknown        |
| M370       | Intermediate        | ER/PR +, HER2-  | Ductal               | 1     | Unknown        |
| M371       | Intermediate        | ER/PR +, HER2-  | Lobular              | 2     | Unknown        |
| M377       | Resistant           | ER/PR +, HER2-  | Ductal               | 3     | Not tested     |
| M378       | Resistant           | ER/PR +, HER2-  | Ductal               | 3     | Not tested     |

BRCA status unknown: it is not known whether this patient underwent *BRCA* testing. BRCA status not tested: based on family history and age, there was no necessity to test for *BRCA* mutations in this patient. Non-BRCA: genetic *BRCA* testing was performed, but no pathogenic *BRCA* mutations were found.

**Table S2.** Characteristics of 10 primary breast cancer tumors for docetaxel treatment.

| <b>Tumor Code</b> | <b>Ex vivo Sensitivity</b> | <b>Receptor Status</b> | <b>Histology</b> | <b>Grade</b> |
|-------------------|----------------------------|------------------------|------------------|--------------|
| M377              | Sensitive                  | ER/PR +, HER2-         | Ductal           | 3            |
| M382              | Sensitive                  | ER/PR +, HER2-         | Ductal           | 3            |
| M395              | Resistant                  | ER/PR +, HER2-         | Ductal           | 2            |
| M403              | Intermediate               | ER/PR +, HER2-         | Ductal           | 2            |
| M412              | Sensitive                  | ER/PR +, HER2-         | Lobular          | 2            |
| M424              | Resistant                  | ER/PR +, HER2-         | Lobular          | 3            |
| M425              | Intermediate               | ER/PR +, HER2-         | Lobular          | 2            |
| M448              | Sensitive                  | ER/PR +, HER2-         | Ductal           | 2            |
| M450              | Intermediate               | ER/PR +, HER2-         | Ductal           | 2            |
| M459              | Sensitive                  | ER/PR +, HER2-         | Lobular          | 2            |

**Table S3.** Characteristics of 20 metastatic biopsies for cisplatin treatment.

| Biopsy no | Successful test | Ex vivo sensitivity | Receptor status | Histology | Grade   | Biopsy type | Biopsy size | Origin    | BRCA status                                       |
|-----------|-----------------|---------------------|-----------------|-----------|---------|-------------|-------------|-----------|---------------------------------------------------|
| M238      | Yes             | Resistant           | ER/PR +, HER2-  | ductal    | 3       | needle      | 14G         | mamma     | Non BRCA                                          |
| M256      | Yes             | Intermediate        | ER/PR +, HER2-  | ductal    | 3       | needle      | 14G         | chestwall | Non BRCA                                          |
| M290      | Yes             | Resistant           | ER/PR +, HER2-  | ductal    | 3       | punch       | 4mm         | chestwall | Non BRCA                                          |
| M313      | Yes             | Sensitive           | ER/PR +, HER2-  | unknown   | unknown | needle      | 18G         | liver     | Not tested                                        |
| M363      | Yes             | Intermediate        | ER/PR +, HER2-  | ductal    | 2       | needle      | 18G         | LN        | Non BRCA                                          |
| M341      | Yes             | Intermediate        | ER/PR +, HER2-  | ductal    | 3       | needle      | unknown     | LN        | BRCA2 mutation                                    |
| M254      | Yes             | Resistant           | ER/PR +, HER2+  | lobular   | unknown | needle      | 14G         | LN        | Not tested                                        |
| M265      | Yes             | Sensitive           | TN              | ductal    | 2       | needle      | 14G         | mamma     | Non BRCA                                          |
| M350      | Yes             | Intermediate        | TN              | ductal    | 3       | needle      | 14G         | mamma     | Non BRCA                                          |
| M366      | Yes             | Intermediate        | TN              | ductal    | 3       | needle      | 14G         | mamma     | Non BRCA                                          |
| M303#     | Yes             | Intermediate        | TN              | ductal    | 3       | needle      | 18G         | other     | BRCA1 mutation, with secondary reversion mutation |
| M367#     | Yes             | Intermediate        | TN              | ductal    | 3       | needle      | 18G         | chestwall | BRCA1 mutation, with secondary reversion mutation |
| M298      | Yes             | Resistant           | unknown         | ductal    | 3       | needle      | 18G         | chestwall | BRCA2 mutation                                    |
| M227      | Partly          | Unknown             | ER+/PR-/HER2-   | ductal    | 2       | needle      | 18G         | liver     | Not tested                                        |
| M234      | Party           | Unknown             | TN              | ductal    | 2       | needle      | 18G         | liver     | BRCA2 mutation                                    |
| M212      | No              |                     | ER/PR +, HER2-  | ductal    | unknown | needle      | 18G         | liver     | Non BRCA                                          |
| M226      | No              |                     | ER/PR +, HER2-  | ductal    | 2       | needle      | 18G         | liver     | Not tested                                        |
| M362      | No              |                     | ER/PR+, HER2-   | ductal    | 3       | needle      | 18G         | liver     | BRCA2 mutation                                    |
| M294      | No              |                     | ER/PR +, HER2-  | ductal    | 3       | needle      | 18G         | LN        | Non BRCA                                          |
| M308      | No              |                     | TN              | ductal    | 3       | needle      | 18G         | chestwall | Non BRCA                                          |
| M323      | No              |                     | TN              | ductal    | 3       | needle      | 18G         | chestwall | Non BRCA                                          |

# Indicates matching biopsies from the same patient, taken at different time points during disease progression. BRCA status unknown: it is not known whether this patient underwent BRCA testing. BRCA status not tested: based on family history and age, there was no necessity to test for BRCA mutations in this patient. Non-BRCA: genetic BRCA testing was performed, but no pathogenic BRCA mutations were found.

**Table S4.** Comparison of histopathological characteristics of successful tests and non-successful drug sensitivity tests on biopsies.

| Tumor characteristic               | Non successful test result | Successful test result | P-value |
|------------------------------------|----------------------------|------------------------|---------|
| Histological grade (primary tumor) |                            |                        |         |
| 1                                  | -                          | -                      | 0.811   |
| 2                                  | 3                          | 2                      |         |
| 3                                  | 4                          | 8                      |         |
| Unknown                            | 1                          | 2                      |         |
| Receptor Status                    |                            |                        |         |
| ER/PR +, HER2-HER2+*               | 5                          | 6                      | 1.000   |
| TNBC                               | -                          | 1                      |         |
|                                    | 3                          | 5                      |         |
| Unknown                            | -                          | -                      |         |
| Biopsy size                        |                            |                        |         |
| 18 G                               | 8                          | 6                      | 0.012   |
| 14 G                               | -                          | 4                      |         |
| 4 mm                               | -                          | 1                      |         |
| Unknown                            | -                          | 1                      |         |
| Metastatic site                    |                            |                        |         |
| Breast                             | -                          | 4                      | 0.078   |
| Chestwall                          | 2                          | 3                      |         |
| Axillary/Cervical/                 |                            |                        |         |
| Pectoral LN                        | 1                          | 3                      |         |
| Liver                              | 5                          | 1                      |         |
| Other                              | -                          | 1                      |         |
| BRCA                               |                            |                        |         |
| Mutation                           | 2                          | 3                      | 0.693   |
| Wild-type                          | 6                          | 9                      |         |
| Total                              | 8                          | 12                     |         |

\*Independent of ER/PR status. Fisher's exact test. ER/PR+ was defined as >10% ER+ and/or >10% PR+. HER2+ defined as immunohistochemistry (IH) 3+ or IH 2+ and HER2 amplification detected by in situ hybridization.

**Table S5.** Comparison of histopathological characteristics of *ex vivo* sensitive, intermediate and resistant metastatic biopsies.

| Tumor characteristic               | Sensitive | Intermediate | Resistant | P-value |       |
|------------------------------------|-----------|--------------|-----------|---------|-------|
| Histological grade (primary tumor) |           |              |           |         |       |
| 1                                  | -         | -            | -         | 0.223   |       |
| 2                                  | 1         | 1            | -         |         |       |
| 3                                  | -         | 6            | 2         |         |       |
| Unknown                            | 1         | -            | 1         |         |       |
| Receptor Status                    |           |              |           |         |       |
| ER/PR +, HER2-HER2+*               | 1         | 3            | 2         | 0.427   |       |
| TNBC                               | -         | -            | 1         |         |       |
| TNBC                               | 1         | 4            | -         |         |       |
| Unknown                            | -         | -            | -         |         |       |
| Biopsy size                        |           |              |           |         |       |
| 18 G                               | 1         | 3            | -         | 0.009   |       |
| 14 G                               | 1         | 3            | 2         |         |       |
| 4 mm                               | -         | -            | 1         |         |       |
| Unknown                            | -         | 1            | -         |         |       |
| Metastatic site                    |           |              |           |         |       |
| Breast                             | 1         | 2            | 1         | 0.148   |       |
| Chestwall                          | -         | 2            | 1         |         |       |
| Axillary/Cervical/<br>Pectoral LN  | -         | 2            | 1         |         |       |
| Liver                              | 1         | -            | -         |         |       |
| Other                              | -         | 1            | -         |         |       |
| BRCA                               |           |              |           |         |       |
| Mutation                           | -         | 3            | 0         |         | 0.518 |
| Wild-type                          | 2         | 4            | 3         |         |       |
| Total                              | 2         | 7            | 3         |         |       |

\*Independent of ER/PR status. Fisher's exact test. ER/PR+ was defined as >10% ER+ and/or >10% PR+. HER2+ defined as immunohistochemistry (IH) 3+ or IH 2+ and HER2 amplification detected by in situ hybridization.

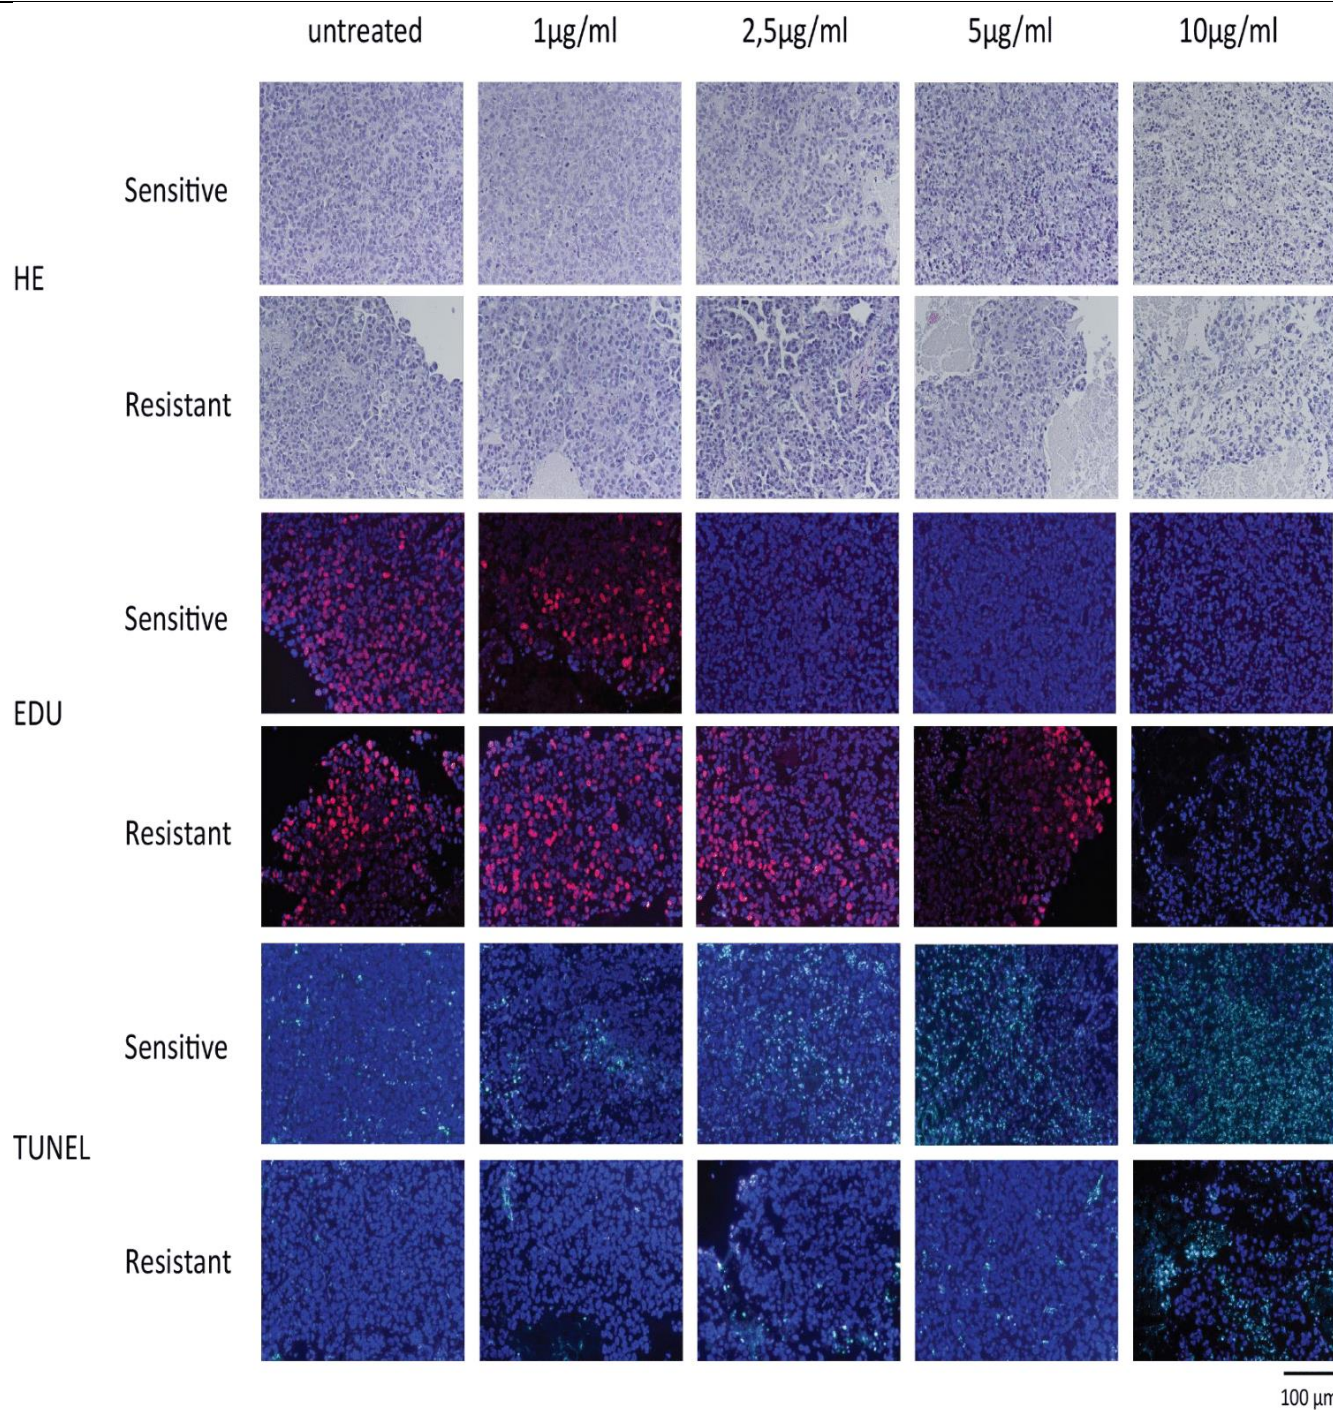

**Figure S1.** *In vivo* sensitive and resistant PDX tumors show differential response to ex vivo cisplatin treatment. Organotypic tissue slices from a sensitive and a resistant PDX tumor were subjected to ex vivo cisplatin treatment for 3 days. Representative HE, EdU (proliferation) and TUNEL (apoptosis) images are shown for each treatment condition (blue = DAPI, red = EdU, green = TUNEL, magnification x200).

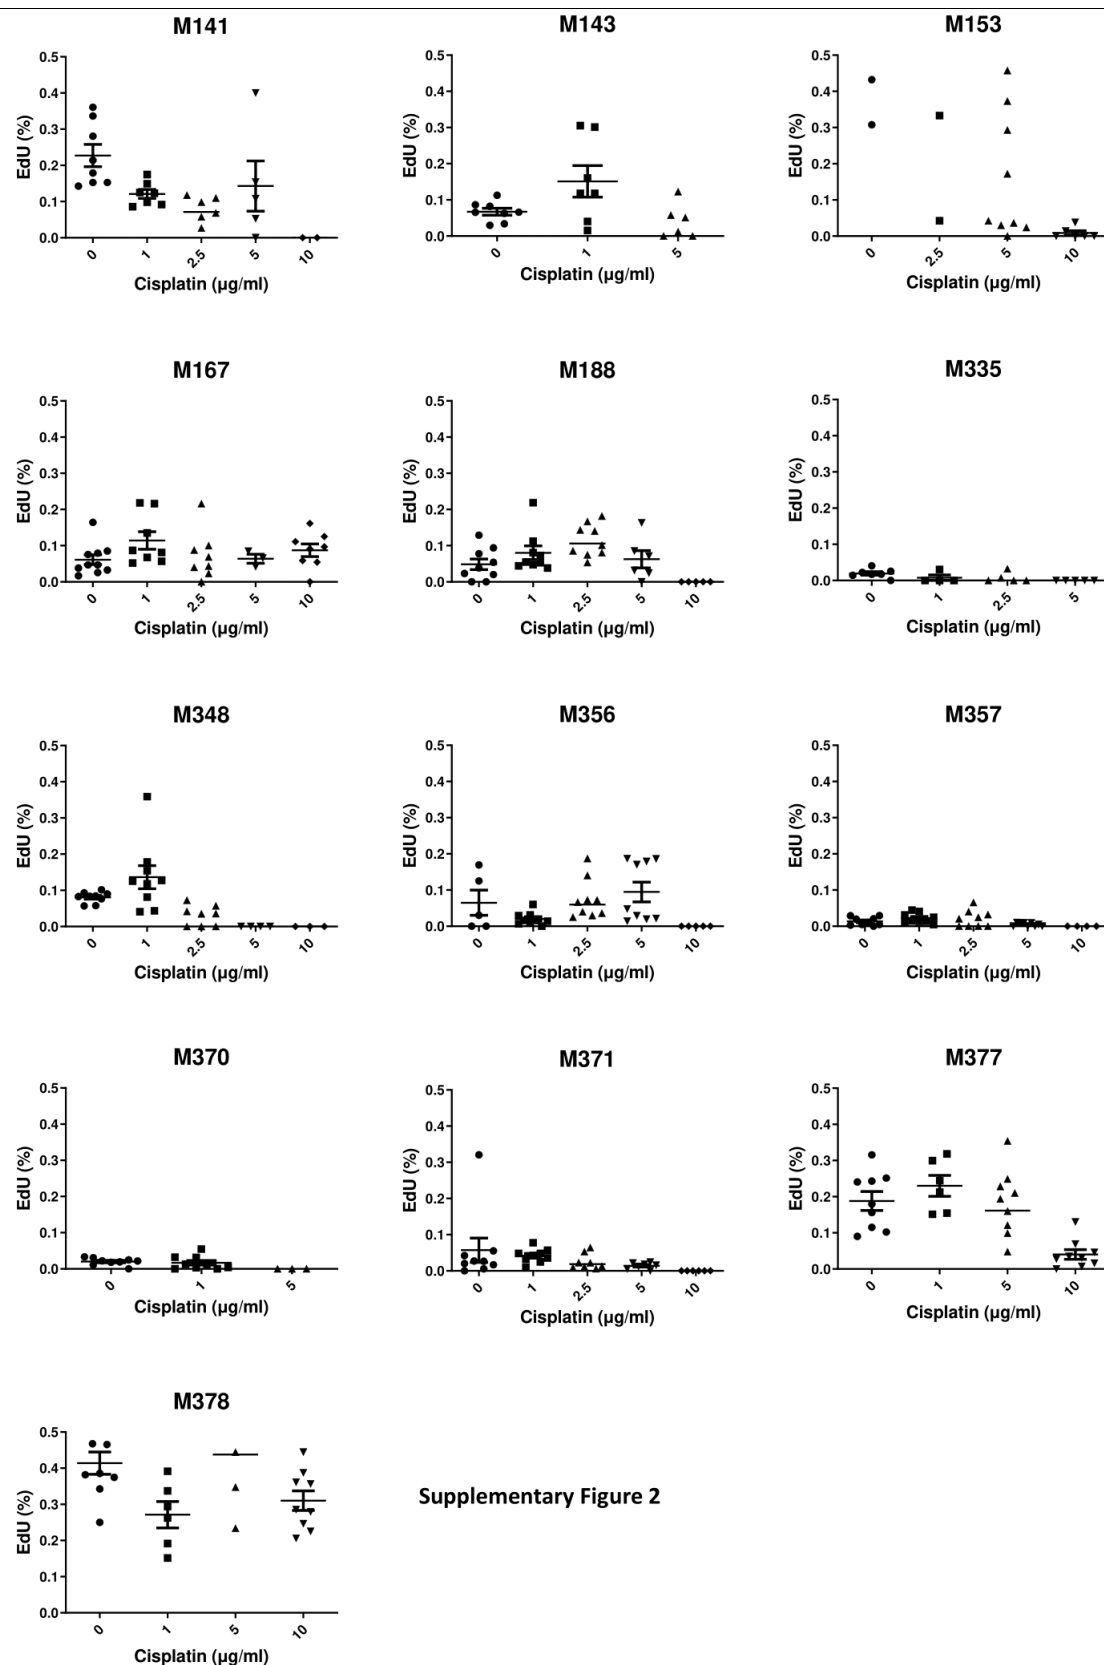

**Figure S2.** Quantifications of proliferation (EdU incorporation) in primary breast cancer tissue slices. Between three and twelve microscopic fields of view were analyzed per tumor slice. The graphs show each point (each circle, triangle and square representing one field of view) with mean and SEM.

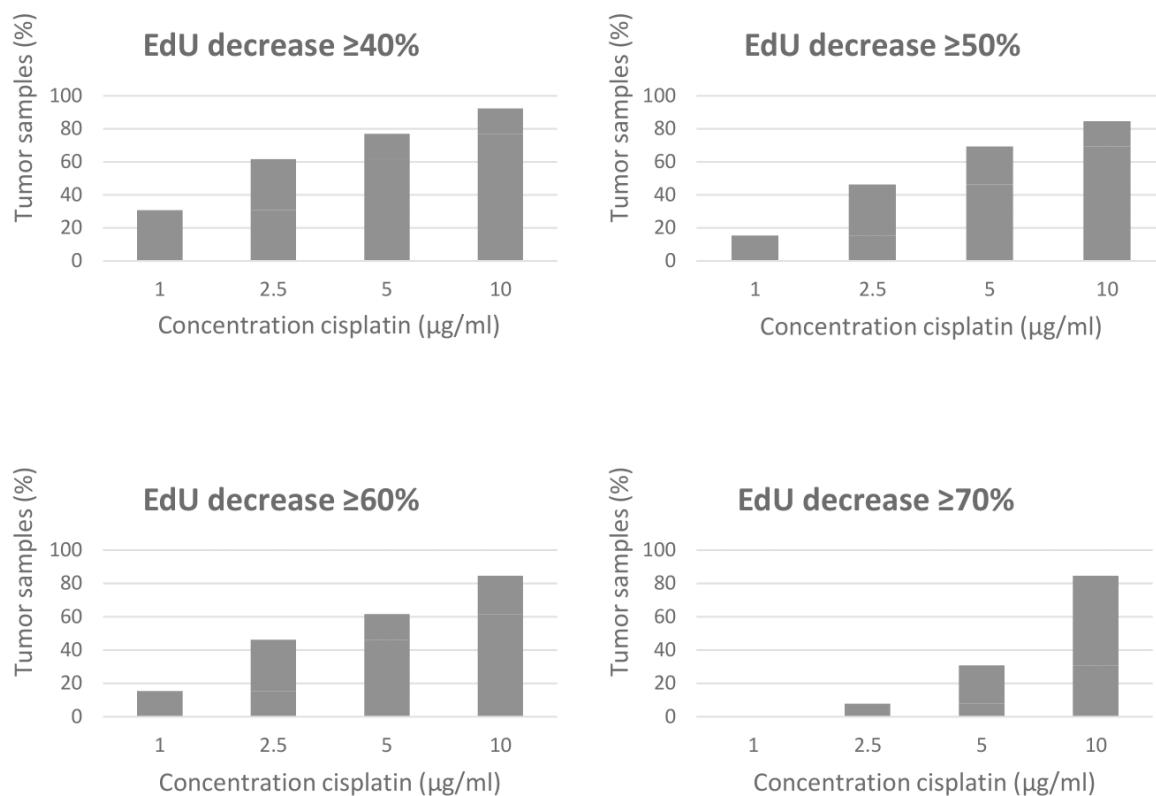

**Figure S3.** Proliferation based on EdU incorporation relative to untreated primary breast cancer slices ( $n = 13$ ). Tumor samples (%) scores the cumulative percentage of tumor samples that reached the threshold at or below that concentration.



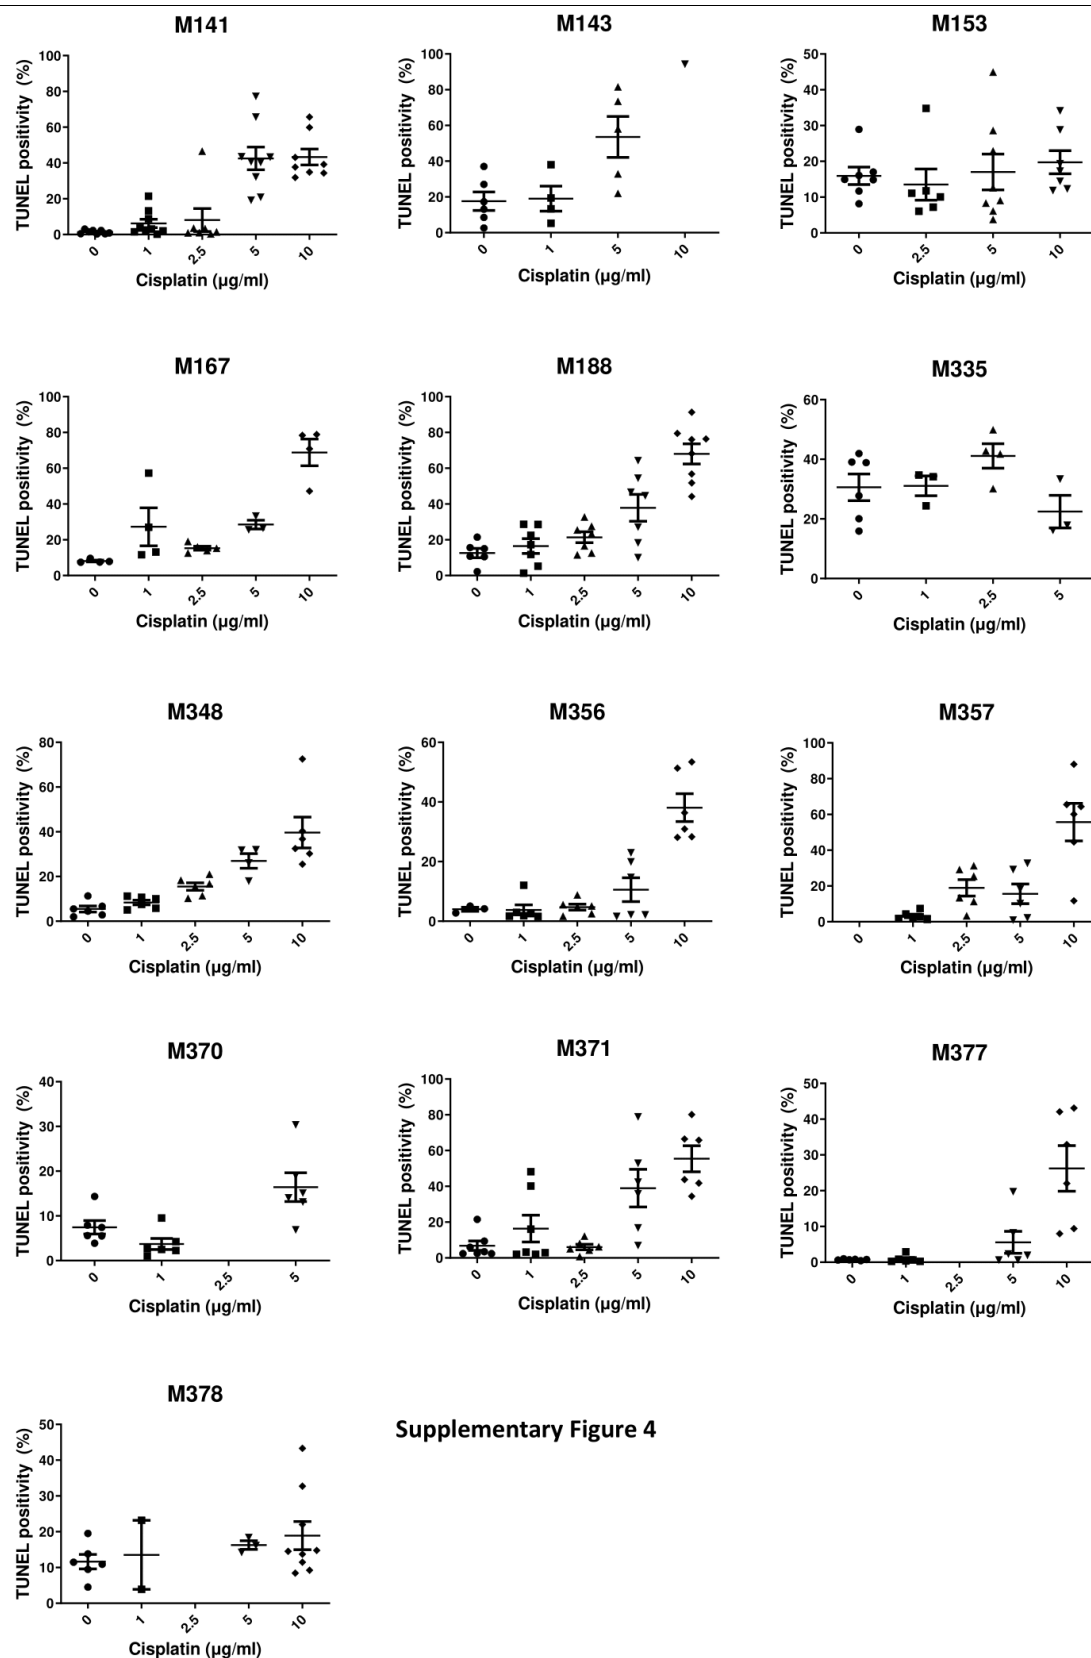

**Figure S4.** Quantification of apoptosis in primary breast cancer slices. The percentage of TUNEL positive pixels relative to the total number of DAPI positive pixels. Between three and twelve microscopic fields of view were analyzed per tumor slice. The graphs show each point (each circle, triangle and square representing one field of view) with mean and SEM.

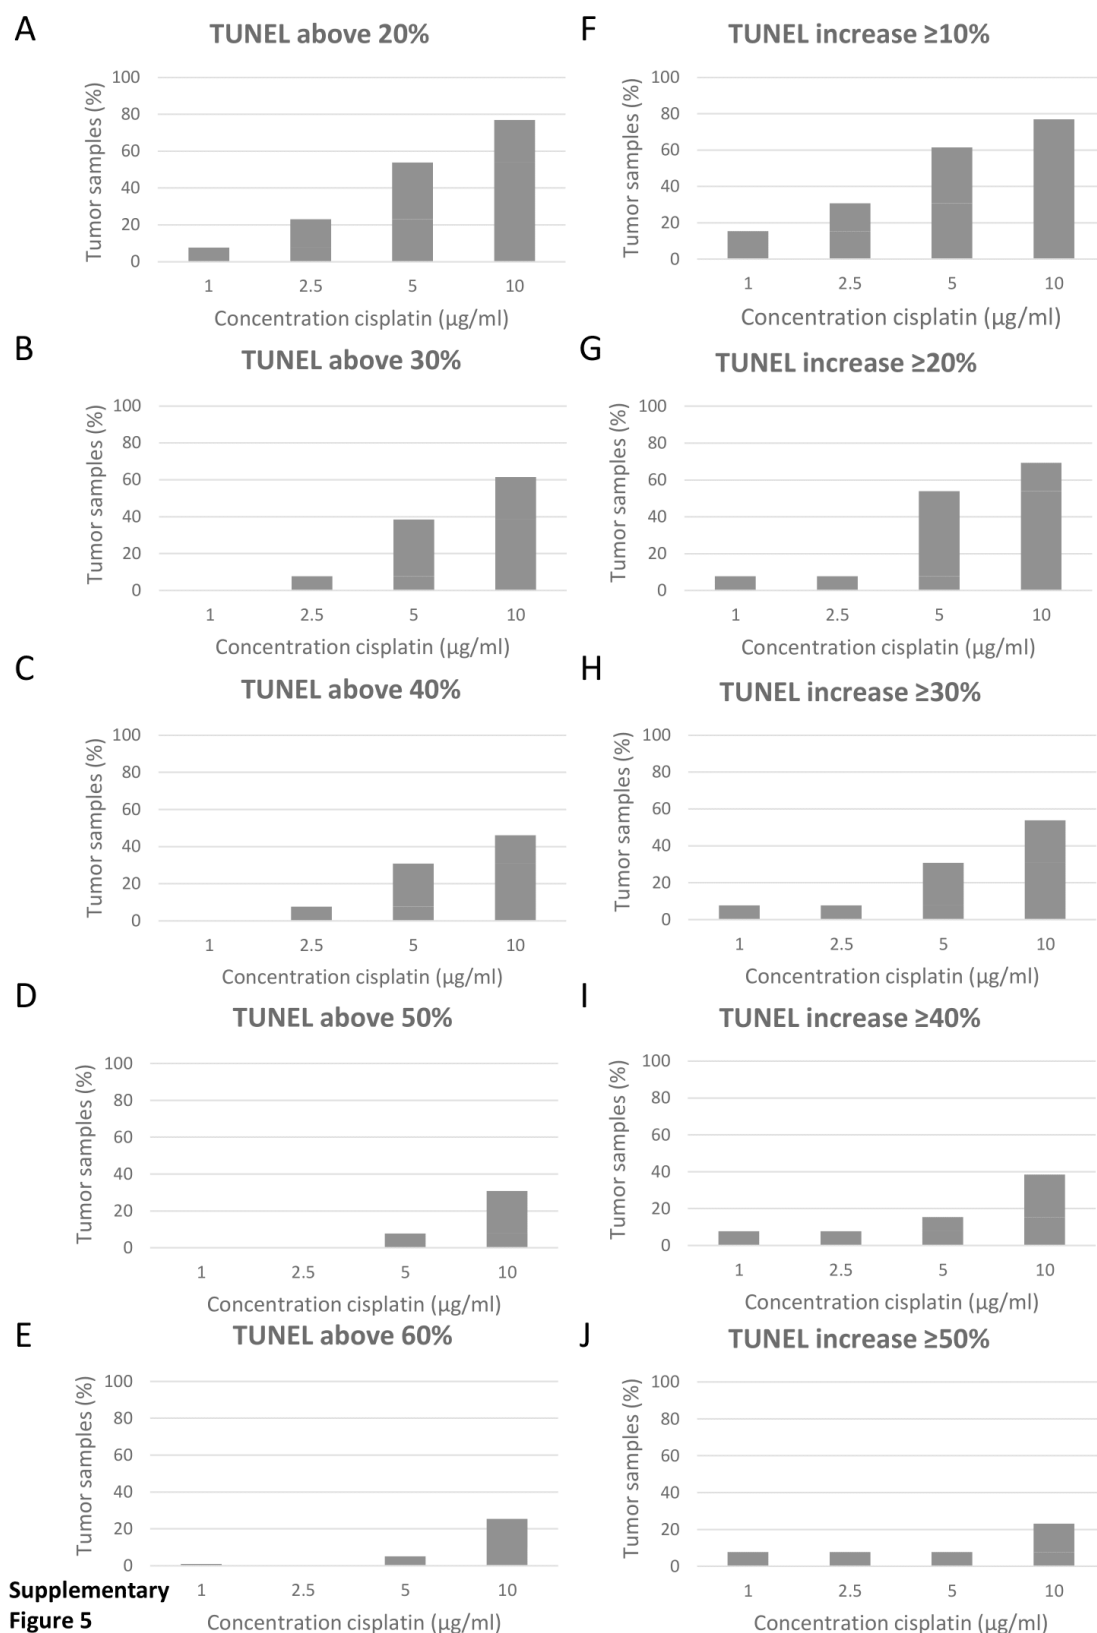

**Figure S5.** Apoptosis measurement using different cut-off values for TUNEL positivity ( $n = 13$ ). (A–E) An absolute value for the cut-off of TUNEL positivity ranging from 20% to 60%, or (F–J) an increase of TUNEL compared to the untreated slices, ranging from 10% to 50% increase. Tumor samples (%) scores the cumulative percentage of tumor samples that reached the threshold at or below that concentration.

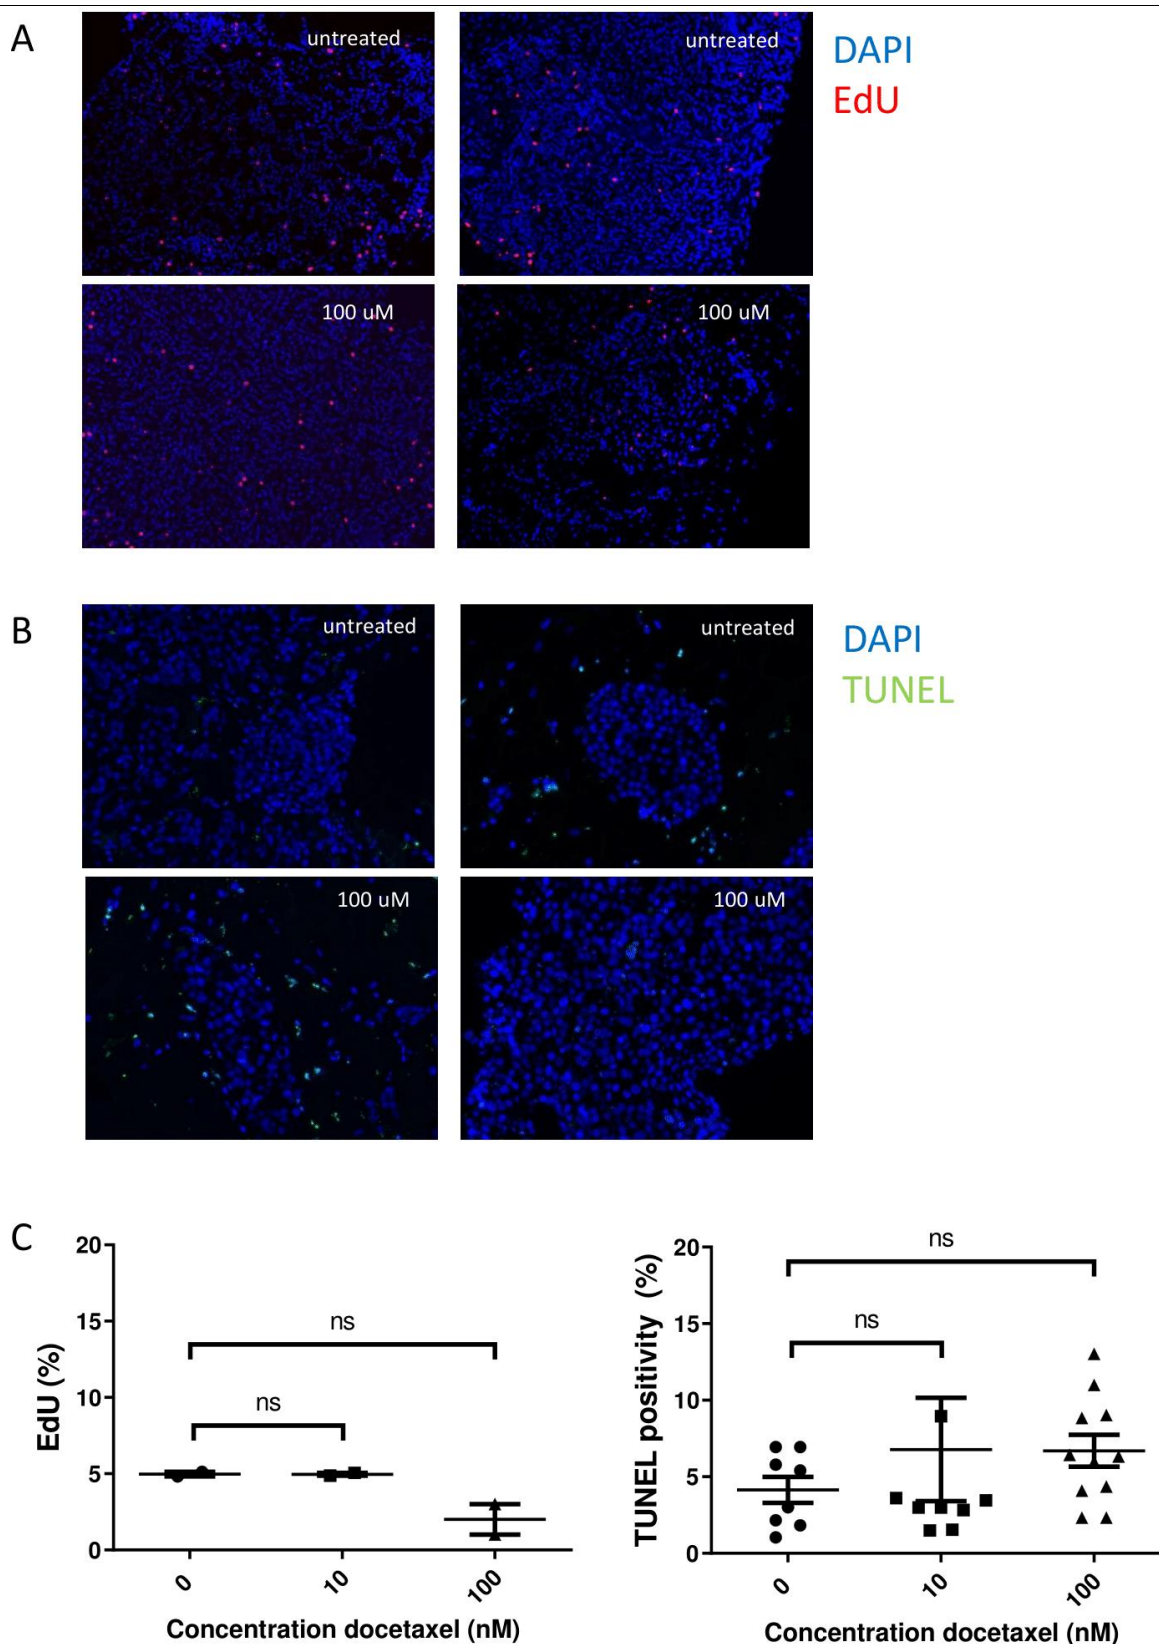

**Figure S6.** Proliferation and apoptosis after docetaxel treatment. (A) Proliferation was measured by EdU staining of primary BC slices treated with 0 and 100 nM docetaxel after 3 days (left panel) and 7 days (right panel). (B) Apoptosis was measured by TUNEL staining of primary BC slices treated with 0 and 100 nM docetaxel after 3 days (left panel) and 8 days (right panel). (C) Quantification of EdU staining for 0, 10 nM and 100 nM docetaxel on day 3 (left panel) and TUNEL staining for 0, 10 nM and 100 nM docetaxel on day 3 (right panel). The graphs show each point (each circle, triangle and square representing one image field) with mean and SEM. \*  $P < 0.05$ , ns = non-significant.

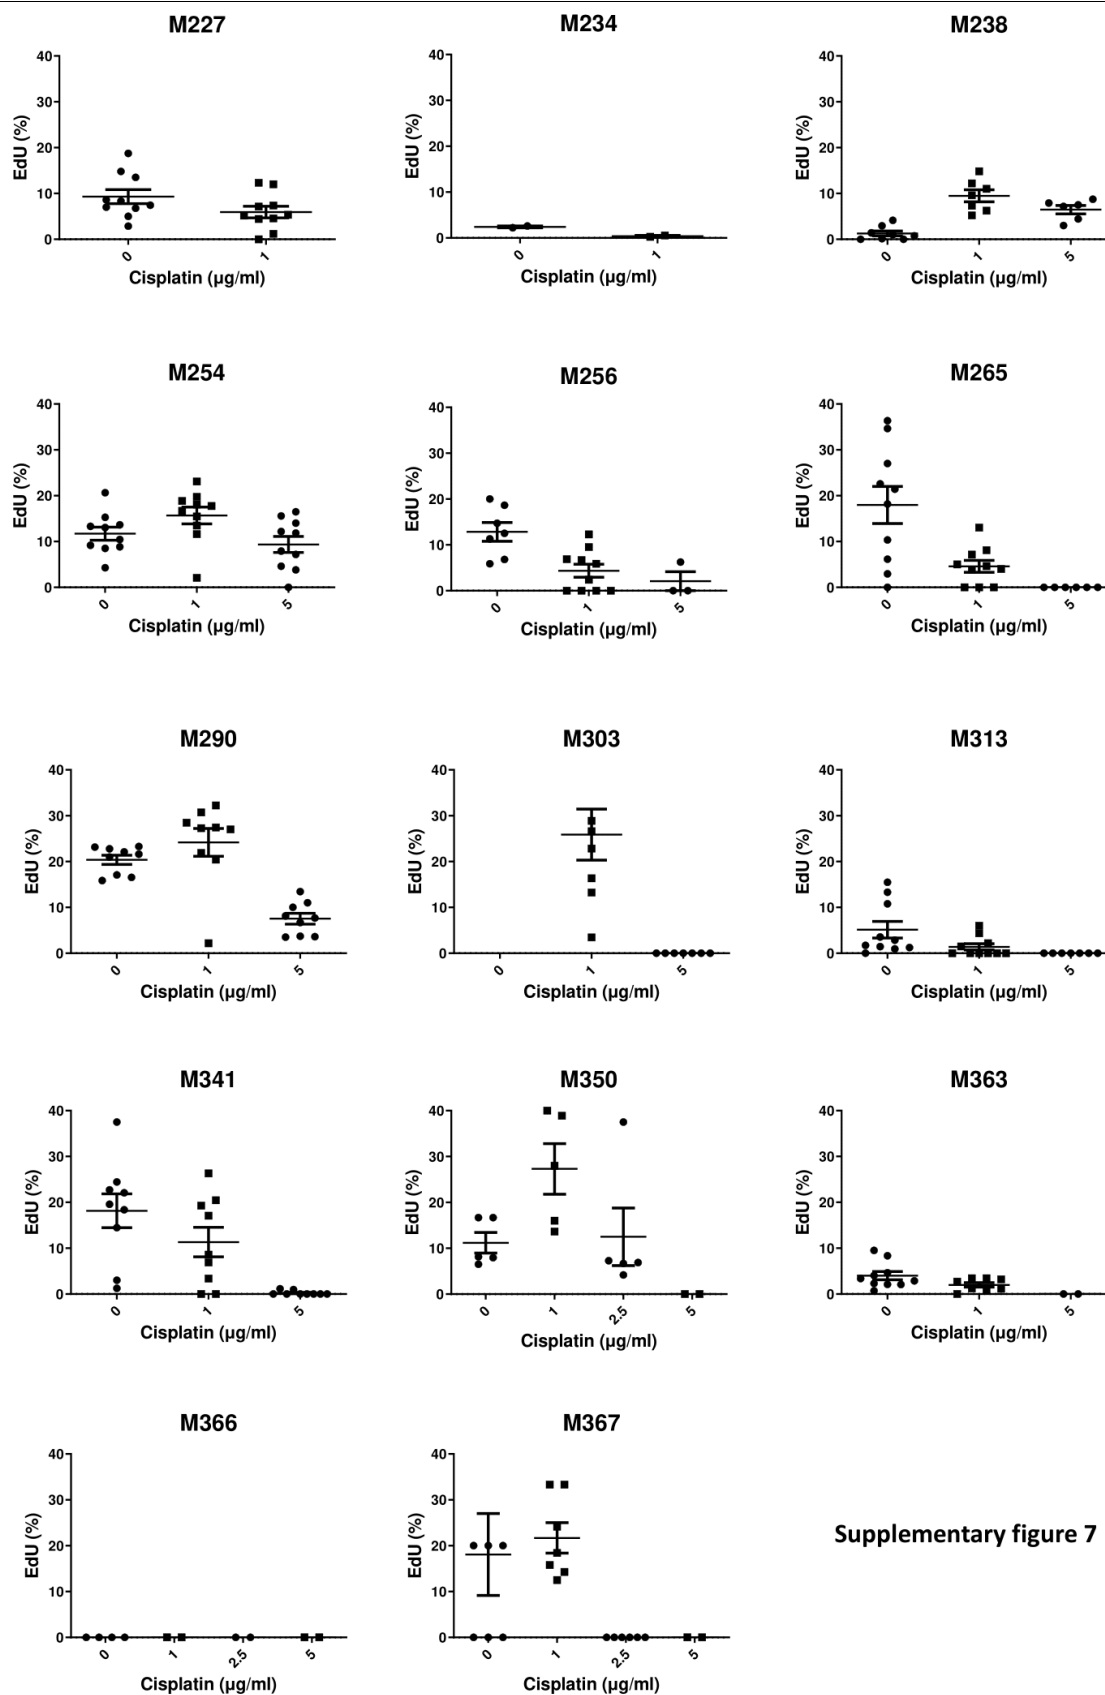

Supplementary figure 7

**Figure S7.** Quantifications of proliferation (EdU incorporation) in metastatic breast cancer biopsy slices. Between three and twelve microscopic fields of view were analyzed per tumor slice. The graphs show each point (each circle, triangle and square representing one field of view) with mean and SEM.

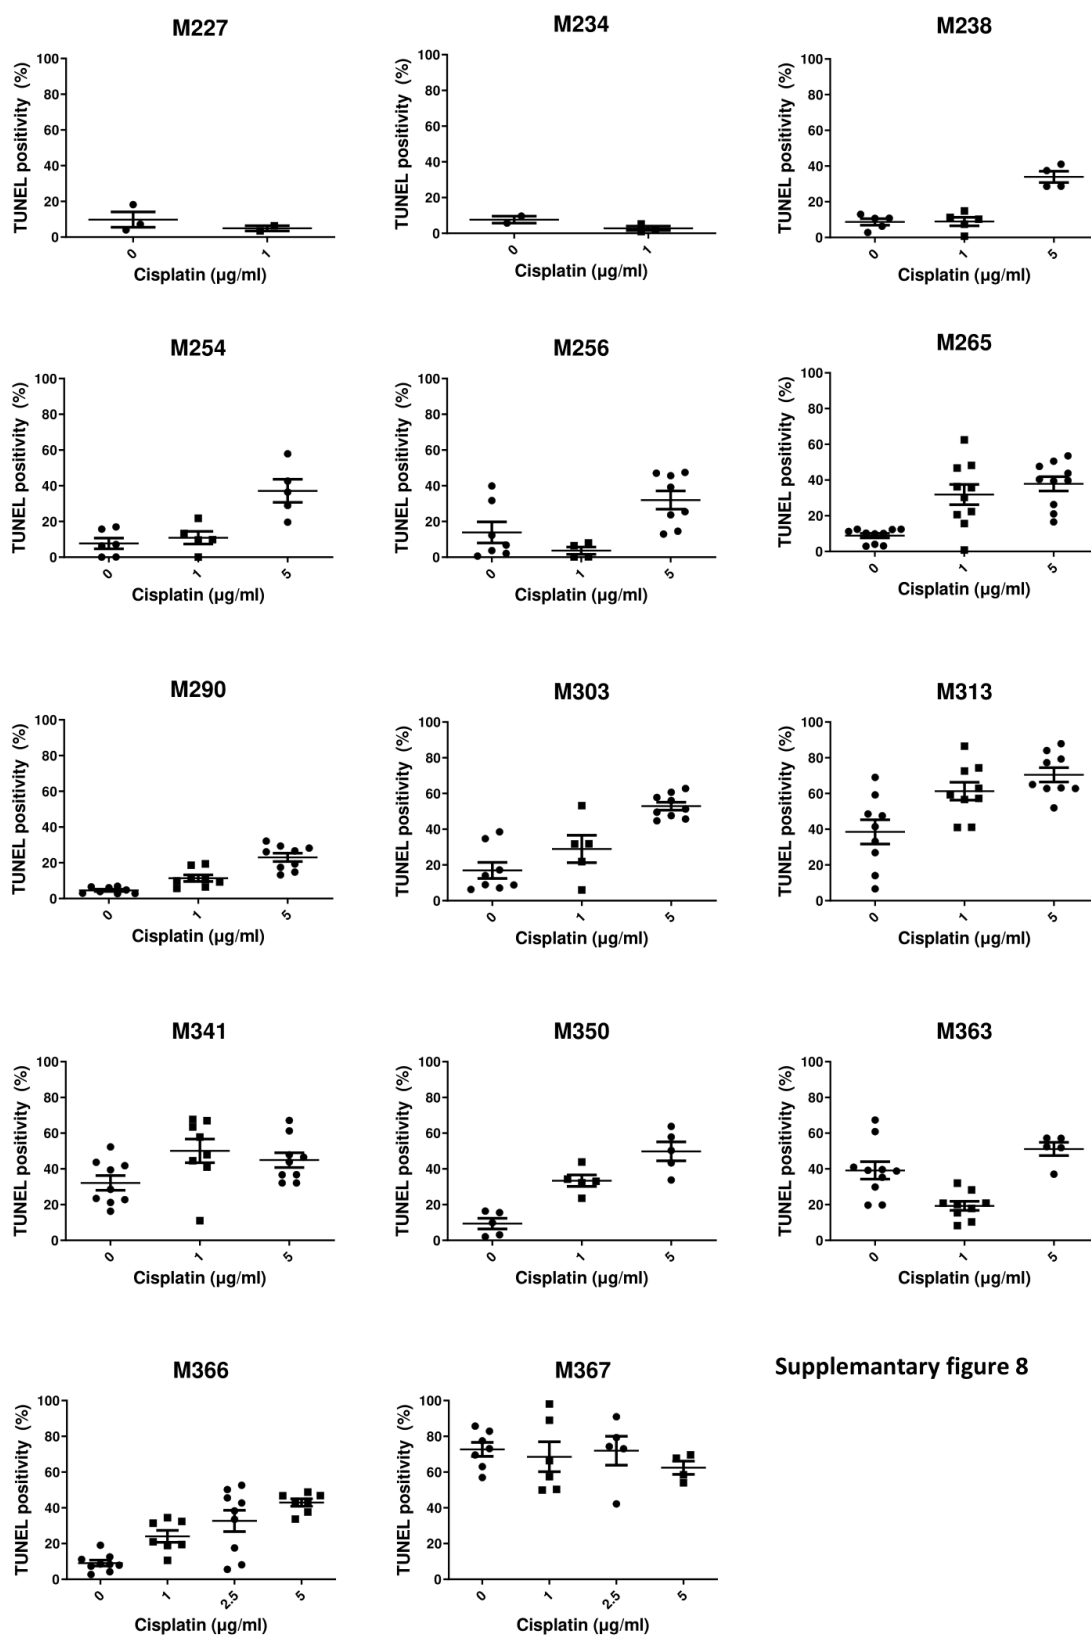

Supplementary figure 8

**Figure S8.** Quantifications of apoptosis (TUNEL staining) in metastatic breast cancer biopsy slices. Between three and twelve fields were analyzed per tumor slice. The graphs show each point (each circle, triangle and square representing one field of view) with mean and SEM.
