# Supplementary material for: Functional Ex Vivo Tissue-Based Chemotherapy Sensitivity Testing for Breast Cancer
Source: MDPI journal article supplement (doi:10.3390/cancers14051252), 2022-02-28
Supplement: s1 [file s1]

Archive with 1 entries (1 files):
- cancers-1584655-supplementary.pdf
